# Supplementary material for: Highly sensitive and rapid detection of acetylcholine using an ITO plate modified with platinum-graphene nanoparticles
Source: Royal Society of Chemistry journal article supplement (doi:10.1039/c4an01873g), 2015-01-01

**Supplementary Fig. 1a.** Effect of pH on the activity of AChE-ChO/PtNPs/GrONPs modified ITO coated glass plate.

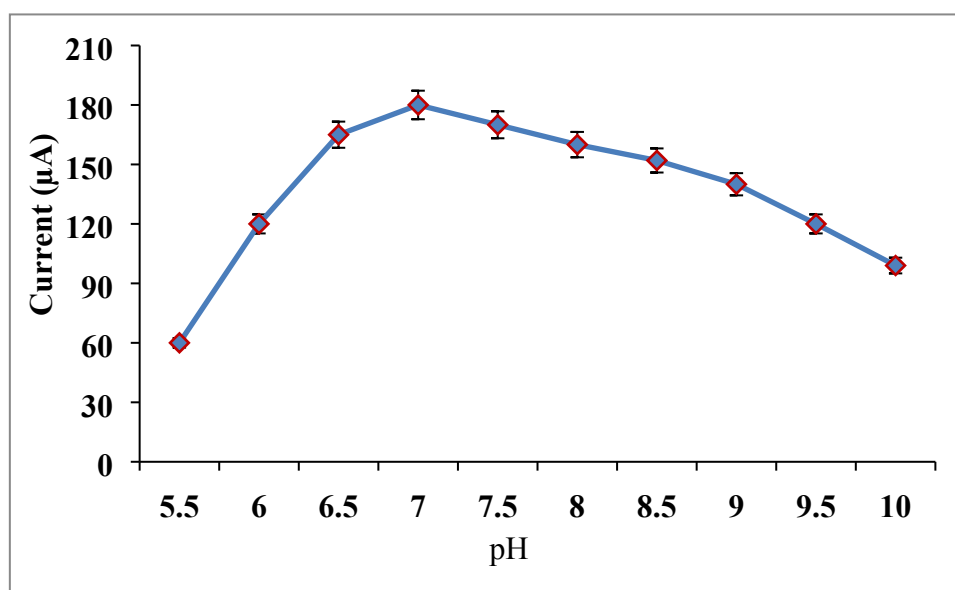

**Supplementary Fig. 1b.** Effect of temperature on the activity of AChE-ChO/PtNPs /GrONPs modified ITO coated glass plate.

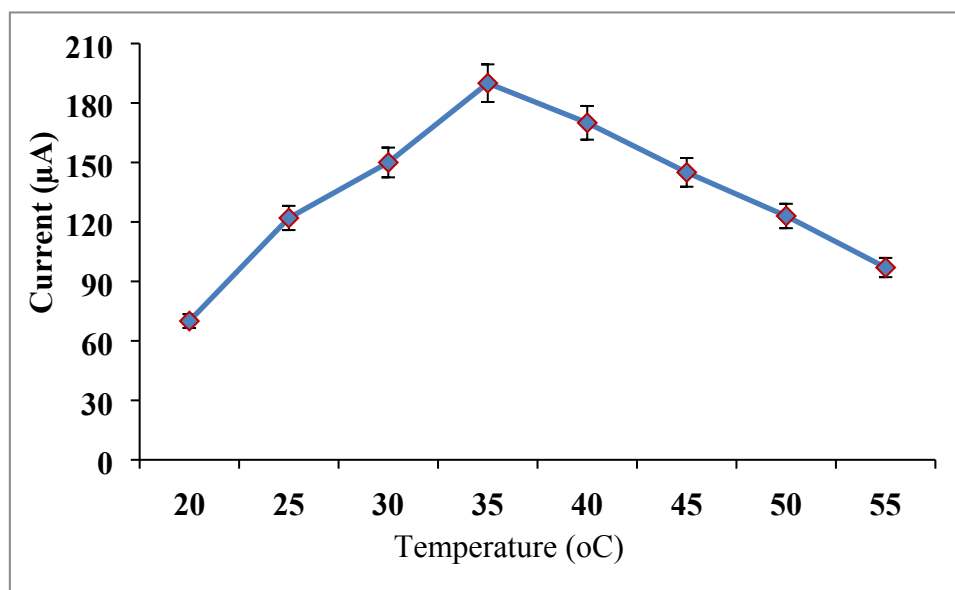

**Supplementary Fig. 1c.** Effect of voltage on the activity of AChE-ChO/PtNPs/GrONPs modified ITO coated glass plate.

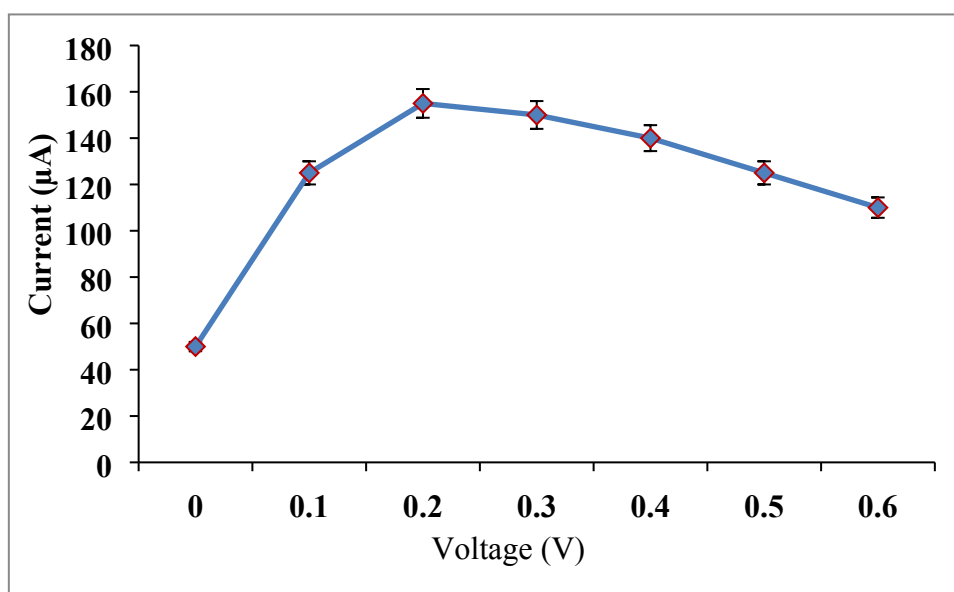

Supplement: c4an01873g1.pdf [file c4an01873g1.pdf]
